# Supplementary material for: The Impact of Digital Elevation Model Preprocessing and Detection Methods on Karst Depression Mapping in Densely Forested Dinaric Mountains
Source: MDPI journal article supplement (doi:10.3390/rs14102416), 2022-05-18

## Supplementary files

### List of tables

Supplementary table S1: The geomorphometric characteristics of karst depressions for the test area in Logaško-begunjski ravnik (according to two detecting methods and input data preprocessing). CV – coefficient of variation.

Supplementary table S2: The geomorphometric characteristics of karst depressions for the test area in Kras (according to two detecting methods and input data preprocessing). CV – coefficient of variation.

Supplementary table S3: The geomorphometric characteristics of karst depressions for the test area in Matarsko podolje (according to two detecting methods and input data preprocessing). CV – coefficient of variation.

### List of figures.

Supplementary figure S1: Detected karst depressions in Kras area based on R1 method and DTM F1.

Supplementary figure S2: Detected karst depressions in Kras area based on R1 method and DTM FS5.

Supplementary figure S3: Detected karst depressions in Kras area based on R1 method and DTM OS.

Supplementary figure S4: Detected karst depressions in Kras area based on S1 method and DTM F1.

Supplementary figure S5: Detected karst depressions in Kras area based on S1 method and DTM FS5.

Supplementary figure S6: Detected karst depressions in Kras area based on S1 method and DTM OS.

Supplementary figure S7: Detected karst depressions in Matarsko podolje area based on R1 method and DTM F1.

Supplementary figure S8: Detected karst depressions in Matarsko podolje area based on R1 method and DTM FS5.

Supplementary figure S9: Detected karst depressions in Matarsko podolje area based on R1 method and DTM OS.

Supplementary figure S10: Detected karst depressions in Matarsko podolje area based on S1 method and DTM F1.

Supplementary figure S11: Detected karst depressions in Matarsko podolje area based on S1 method and DTM FS5.

Supplementary figure S12: Detected karst depressions in Matarsko podolje area based on S1 method and DTM OS.

Supplementary figure S13: Detected karst depressions in Logaško-begunjski ravnik area based on R1 method and DTM F1.

Supplementary figure S14: Detected karst depressions in Logaško-begunjski ravnik area based on R1 method and DTM FS5.

Supplementary figure S15: Detected karst depressions in Logaško-begunjski ravnik area based on R1 method and DTM OS.

Supplementary figure S16: Detected karst depressions in Logaško-begunjski ravnik area based on S1 method and DTM F1.

Supplementary figure S17: Detected karst depressions in Logaško-begunjski ravnik area based on S1 method and DTM FS5.

Supplementary figure S18: Detected karst depressions in Logaško-begunjski ravnik area based on S1 method and DTM OS.

Supplementary table S1: The geomorphometric characteristics of enclosed karst depressions for the test area in Logaško-begunjski ravnik (according to two detecting methods and input data preprocessing). CV – coefficient of variation.

| geomorphometric characteristics | S1      |        |      | R1      |        |      |
|---------------------------------|---------|--------|------|---------|--------|------|
|                                 | Mean    | Median | CV   | Mean    | Median | CV   |
| F1                              |         |        |      |         |        |      |
| AREA (m <sup>2</sup> )          | 599.77  | 464.50 | 0.79 | 611.08  | 454.00 | 0.84 |
| VOL (m <sup>3</sup> )           | 1271.33 | 697.08 | 1.37 | 1360.53 | 703.68 | 1.45 |
| HDIST (m)                       | 2.48    | 2.24   | 0.62 | 2.91    | 2.37   | 1.00 |
| RAT_DD                          | 0.18    | 0.16   | 0.58 | 0.21    | 0.17   | 0.70 |
| ELONG                           | 1.27    | 1.23   | 0.14 | 1.22    | 1.21   | 0.11 |
| CIRCB                           | 2.10    | 2.05   | 0.12 | 1.82    | 1.82   | 0.06 |
| RAT_DP                          | 0.16    | 0.16   | 0.30 | 0.16    | 0.15   | 0.35 |
| ORIENT                          | 90.52   | 91.50  | 0.55 | 87.66   | 87.27  | 0.57 |
| SLOPE (°)                       | 20.94   | 20.49  | 0.19 | 20.84   | 20.34  | 0.20 |
| SH_3                            | 0.01    | 0.01   | 1.14 | 0.01    | 0.00   | 1.18 |
| VRM_MEAN                        | 0.01    | 0.01   | 0.81 | 0.01    | 0.00   | 0.95 |
| DEPTH (m)                       | 4.11    | 3.74   | 0.41 | 4.09    | 3.63   | 0.43 |
| FS5                             |         |        |      |         |        |      |
| AREA (m <sup>2</sup> )          | 769.61  | 581.00 | 0.75 | 794.16  | 597.50 | 0.83 |
| VOL (m <sup>3</sup> )           | 1607.39 | 852.82 | 1.39 | 1738.33 | 906.00 | 1.54 |
| HDIST (m)                       | 2.13    | 1.80   | 0.69 | 2.51    | 1.84   | 1.18 |
| RAT_DD                          | 0.13    | 0.11   | 0.56 | 0.14    | 0.12   | 0.74 |
| ELONG                           | 1.26    | 1.22   | 0.13 | 1.25    | 1.21   | 0.14 |
| CIRCB                           | 1.73    | 1.70   | 0.07 | 1.70    | 1.68   | 0.06 |
| RAT_DP                          | 0.13    | 0.13   | 0.20 | 0.14    | 0.13   | 0.20 |
| ORIENT                          | 95.84   | 99.25  | 0.52 | 92.38   | 91.85  | 0.53 |
| SLOPE (°)                       | 17.81   | 17.79  | 0.16 | 18.17   | 18.17  | 0.17 |
| SH_3                            | 0.01    | 0.01   | 0.86 | 0.01    | 0.00   | 0.93 |
| VRM_MEAN                        | 0.00    | 0.00   | 0.79 | 0.00    | 0.00   | 0.77 |
| DEPTH (m)                       | 4.02    | 3.55   | 0.43 | 4.07    | 3.54   | 0.45 |
| OS                              |         |        |      |         |        |      |
| AREA (m <sup>2</sup> )          | 597.64  | 465.00 | 0.79 | 611.50  | 454.00 | 0.84 |
| VOL (m <sup>3</sup> )           | 1269.28 | 702.96 | 1.37 | 1359.90 | 699.71 | 1.45 |
| HDIST (m)                       | 2.45    | 2.21   | 0.61 | 2.99    | 2.37   | 1.05 |
| RAT_DD                          | 0.18    | 0.16   | 0.58 | 0.21    | 0.18   | 0.74 |
| ELONG                           | 1.26    | 1.23   | 0.14 | 1.22    | 1.21   | 0.11 |
| CIRCB                           | 2.07    | 2.04   | 0.11 | 1.82    | 1.82   | 0.06 |
| RAT_DP                          | 0.16    | 0.16   | 0.31 | 0.16    | 0.15   | 0.35 |
| ORIENT                          | 90.53   | 89.78  | 0.55 | 87.20   | 86.75  | 0.57 |
| SLOPE (°)                       | 21.00   | 20.50  | 0.18 | 20.80   | 20.30  | 0.20 |
| SH_3                            | 0.01    | 0.00   | 1.13 | 0.01    | 0.00   | 1.17 |
| VRM_MEAN                        | 0.01    | 0.01   | 0.81 | 0.01    | 0.00   | 0.94 |
| DEPTH (m)                       | 4.11    | 3.74   | 0.41 | 4.09    | 3.63   | 0.43 |

Supplementary table S2: The geomorphometric characteristics of enclosed karst depressions for the test area in Kras (according to two detecting methods and input data preprocessing). CV – coefficient of variation.

| geomorphometric characteristics | S1      |         |      | R1      |         |      |
|---------------------------------|---------|---------|------|---------|---------|------|
|                                 | Mean    | Median  | CV   | Mean    | Median  | CV   |
| F1                              |         |         |      |         |         |      |
| AREA (m <sup>2</sup> )          | 725.33  | 479.00  | 1.01 | 840.02  | 453.50  | 1.51 |
| VOL (m <sup>3</sup> )           | 1697.75 | 630.40  | 1.96 | 3160.24 | 897.54  | 2.85 |
| HDIST (m)                       | 5.22    | 4.25    | 0.73 | 5.58    | 3.66    | 1.14 |
| RAT_DD                          | 0.31    | 0.30    | 0.49 | 0.32    | 0.29    | 0.58 |
| ELONG                           | 1.33    | 1.27    | 0.17 | 1.20    | 1.18    | 0.10 |
| CIRCB                           | 2.62    | 2.46    | 0.26 | 1.81    | 1.81    | 0.05 |
| RAT_DP                          | 0.20    | 0.16    | 0.93 | 0.21    | 0.17    | 1.08 |
| ORIENT                          | 111.98  | 123.39  | 0.43 | 105.55  | 111.88  | 0.46 |
| SLOPE (°)                       | 19.64   | 18.77   | 0.35 | 22.67   | 21.56   | 0.31 |
| SH_3                            | 0.04    | 0.02    | 1.35 | 0.02    | 0.00    | 1.93 |
| VRM_MEAN                        | 0.01    | 0.01    | 1.22 | 0.01    | 0.01    | 1.07 |
| DEPTH (m)                       | 5.25    | 4.00    | 0.79 | 5.88    | 4.35    | 0.95 |
| FS5                             |         |         |      |         |         |      |
| AREA (m <sup>2</sup> )          | 1201.37 | 829.00  | 1.06 | 1325.23 | 749.00  | 1.49 |
| VOL (m <sup>3</sup> )           | 3261.64 | 1118.30 | 2.10 | 5101.63 | 1244.53 | 3.29 |
| HDIST (m)                       | 6.23    | 4.74    | 0.82 | 6.39    | 3.94    | 1.21 |
| RAT_DD                          | 0.28    | 0.27    | 0.48 | 0.27    | 0.24    | 0.62 |
| ELONG                           | 1.32    | 1.27    | 0.20 | 1.24    | 1.22    | 0.13 |
| CIRCB                           | 1.82    | 1.77    | 0.12 | 1.72    | 1.69    | 0.07 |
| RAT_DP                          | 0.16    | 0.14    | 0.66 | 0.17    | 0.14    | 0.73 |
| ORIENT                          | 110.38  | 123.35  | 0.46 | 111.16  | 119.74  | 0.44 |
| SLOPE (°)                       | 17.26   | 16.06   | 0.39 | 19.03   | 17.71   | 0.35 |
| SH_3                            | 0.05    | 0.02    | 1.40 | 0.02    | 0.00    | 1.96 |
| VRM_MEAN                        | 0.00    | 0.00    | 1.63 | 0.00    | 0.00    | 1.38 |
| DEPTH (m)                       | 5.66    | 4.26    | 0.80 | 6.26    | 4.41    | 1.10 |
| OS                              |         |         |      |         |         |      |
| AREA (m <sup>2</sup> )          | 671.43  | 438.50  | 1.03 | 843.20  | 453.50  | 1.51 |
| VOL (m <sup>3</sup> )           | 1648.63 | 621.22  | 2.02 | 3167.13 | 897.62  | 2.84 |
| HDIST (m)                       | 4.78    | 3.91    | 0.75 | 5.60    | 3.64    | 1.13 |
| RAT_DD                          | 0.30    | 0.29    | 0.50 | 0.32    | 0.29    | 0.58 |
| ELONG                           | 1.30    | 1.26    | 0.15 | 1.20    | 1.18    | 0.10 |
| CIRCB                           | 2.35    | 2.28    | 0.16 | 1.82    | 1.81    | 0.05 |
| RAT_DP                          | 0.20    | 0.17    | 0.91 | 0.21    | 0.17    | 1.08 |
| ORIENT                          | 110.18  | 121.29  | 0.44 | 105.41  | 112.33  | 0.46 |
| SLOPE (°)                       | 20.62   | 19.90   | 0.32 | 22.65   | 21.61   | 0.31 |
| SH_3                            | 0.02    | 0.01    | 1.25 | 0.02    | 0.00    | 1.92 |
| VRM_MEAN                        | 0.01    | 0.01    | 1.20 | 0.01    | 0.01    | 1.07 |
| DEPTH (m)                       | 5.23    | 3.97    | 0.80 | 5.89    | 4.29    | 0.95 |

Supplementary table S3: The geomorphometric characteristics of enclosed karst depressions for the test area in Matarsko podolje (according to two detecting methods and input data preprocessing). CV – coefficient of variation.

| geomorphometric characteristics | S1      |         |      | R1      |         |      |
|---------------------------------|---------|---------|------|---------|---------|------|
|                                 | Mean    | Median  | CV   | Mean    | Median  | CV   |
| F1                              |         |         |      |         |         |      |
| AREA (m <sup>2</sup> )          | 726.52  | 586.00  | 0.75 | 868.96  | 724.00  | 0.76 |
| VOL (m <sup>3</sup> )           | 1536.78 | 952.87  | 1.17 | 2010.64 | 1267.15 | 1.18 |
| HDIST (m)                       | 3.20    | 2.81    | 0.60 | 4.78    | 3.75    | 0.80 |
| RAT_DD                          | 0.21    | 0.19    | 0.57 | 0.27    | 0.24    | 0.63 |
| ELONG                           | 1.25    | 1.21    | 0.13 | 1.22    | 1.19    | 0.12 |
| CIRCB                           | 2.11    | 2.07    | 0.12 | 1.82    | 1.81    | 0.07 |
| RAT_DP                          | 0.17    | 0.15    | 0.84 | 0.14    | 0.14    | 0.33 |
| ORIENT                          | 89.82   | 89.26   | 0.51 | 87.19   | 87.75   | 0.48 |
| SLOPE (°)                       | 20.19   | 19.39   | 0.28 | 18.81   | 18.24   | 0.22 |
| SH_3                            | 0.01    | 0.01    | 1.19 | 0.03    | 0.01    | 1.46 |
| VRM_MEAN                        | 0.01    | 0.00    | 1.41 | 0.00    | 0.00    | 0.92 |
| DEPTH (m)                       | 4.45    | 4.08    | 0.47 | 4.39    | 3.98    | 0.44 |
| FS5                             |         |         |      |         |         |      |
| AREA (m <sup>2</sup> )          | 1071.01 | 870.00  | 0.73 | 1162.15 | 895.50  | 0.81 |
| VOL (m <sup>3</sup> )           | 2301.68 | 1434.11 | 1.19 | 2666.96 | 1610.46 | 1.25 |
| HDIST (m)                       | 3.37    | 2.87    | 0.69 | 4.29    | 3.07    | 1.03 |
| RAT_DD                          | 0.17    | 0.16    | 0.55 | 0.19    | 0.17    | 0.68 |
| ELONG                           | 1.26    | 1.22    | 0.15 | 1.26    | 1.22    | 0.15 |
| CIRCB                           | 1.75    | 1.72    | 0.07 | 1.72    | 1.70    | 0.07 |
| RAT_DP                          | 0.13    | 0.12    | 0.35 | 0.13    | 0.12    | 0.35 |
| ORIENT                          | 90.53   | 91.96   | 0.51 | 89.61   | 90.31   | 0.52 |
| SLOPE (°)                       | 16.73   | 16.33   | 0.24 | 16.93   | 16.52   | 0.24 |
| SH_3                            | 0.02    | 0.01    | 1.31 | 0.02    | 0.01    | 1.46 |
| VRM_MEAN                        | 0.00    | 0.00    | 2.21 | 0.00    | 0.00    | 2.29 |
| DEPTH (m)                       | 4.40    | 4.08    | 0.43 | 4.54    | 4.18    | 0.44 |
| OS                              |         |         |      |         |         |      |
| AREA (m <sup>2</sup> )          | 729.05  | 587.50  | 0.75 | 868.34  | 724.50  | 0.76 |
| VOL (m <sup>3</sup> )           | 1545.32 | 956.39  | 1.16 | 2005.30 | 1270.71 | 1.17 |
| HDIST (m)                       | 3.19    | 2.80    | 0.60 | 4.78    | 3.76    | 0.80 |
| RAT_DD                          | 0.21    | 0.19    | 0.58 | 0.27    | 0.24    | 0.63 |
| ELONG                           | 1.25    | 1.21    | 0.13 | 1.22    | 1.19    | 0.12 |
| CIRCB                           | 2.10    | 2.06    | 0.12 | 1.82    | 1.81    | 0.07 |
| RAT_DP                          | 0.17    | 0.15    | 0.84 | 0.14    | 0.14    | 0.33 |
| ORIENT                          | 90.30   | 89.63   | 0.51 | 87.31   | 87.81   | 0.48 |
| SLOPE (°)                       | 20.23   | 19.44   | 0.28 | 18.79   | 18.23   | 0.23 |
| SH_3                            | 0.01    | 0.01    | 1.20 | 0.03    | 0.01    | 1.46 |
| VRM_MEAN                        | 0.01    | 0.00    | 1.42 | 0.00    | 0.00    | 0.92 |
| DEPTH (m)                       | 4.46    | 4.12    | 0.47 | 4.39    | 4.00    | 0.44 |



Supplementary figure S1: Detected karst depressions in Kras area based on R1 method and DTM F1.

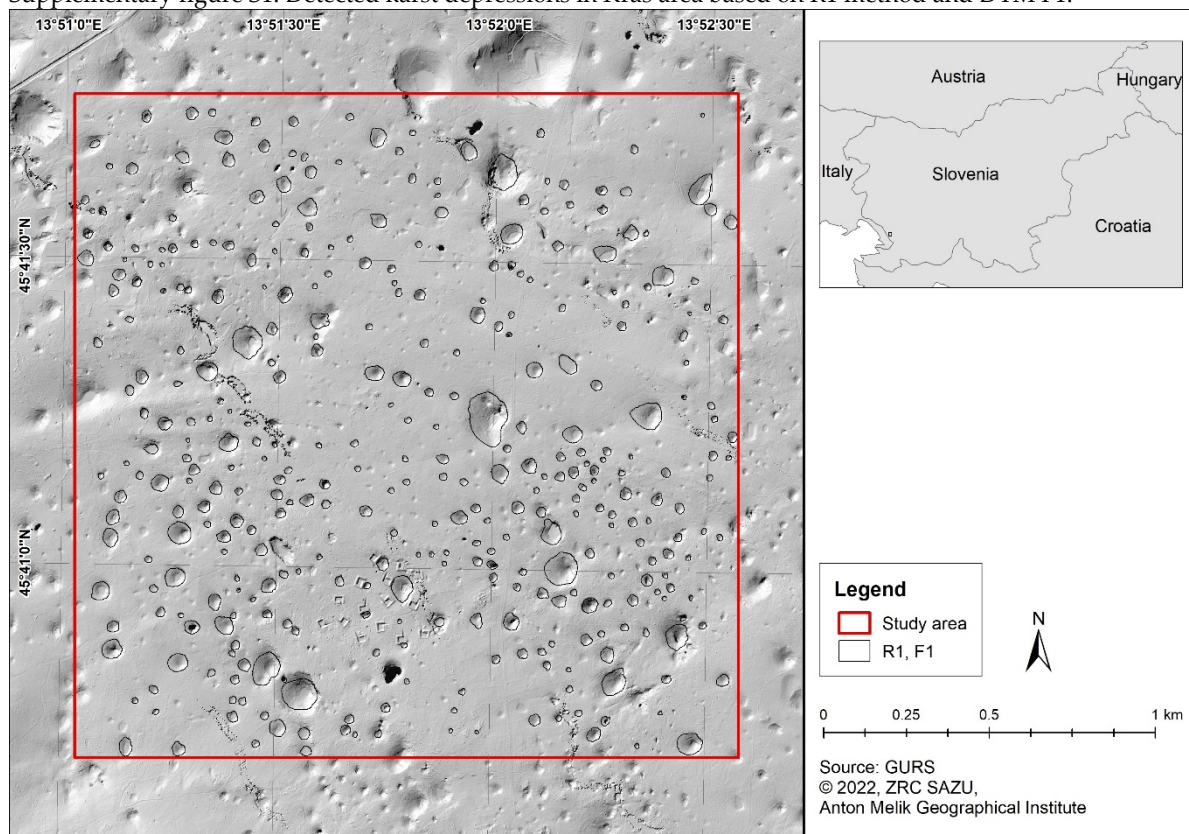

Supplementary figure S2: Detected karst depressions in Kras area based on R1 method and DTM FS5.

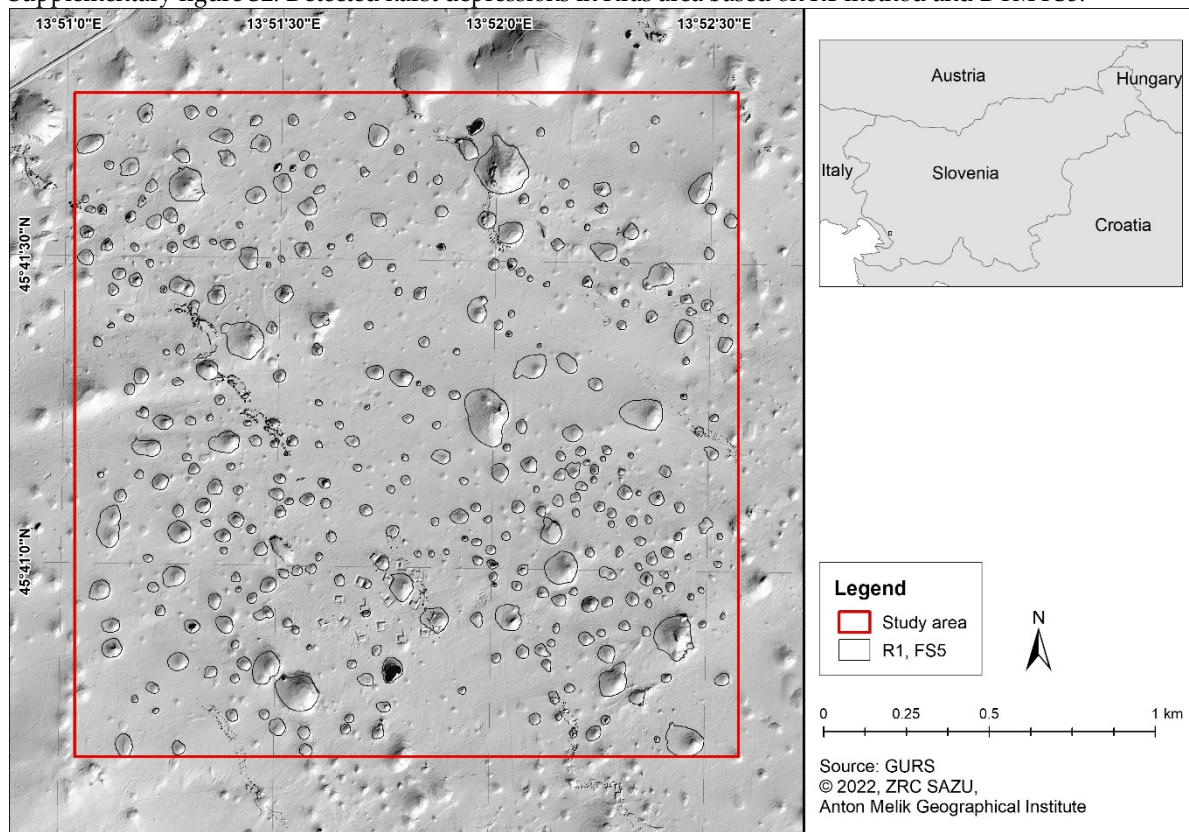



Supplementary figure S3: Detected karst depressions in Kras area based on R1 method and DTM OS.

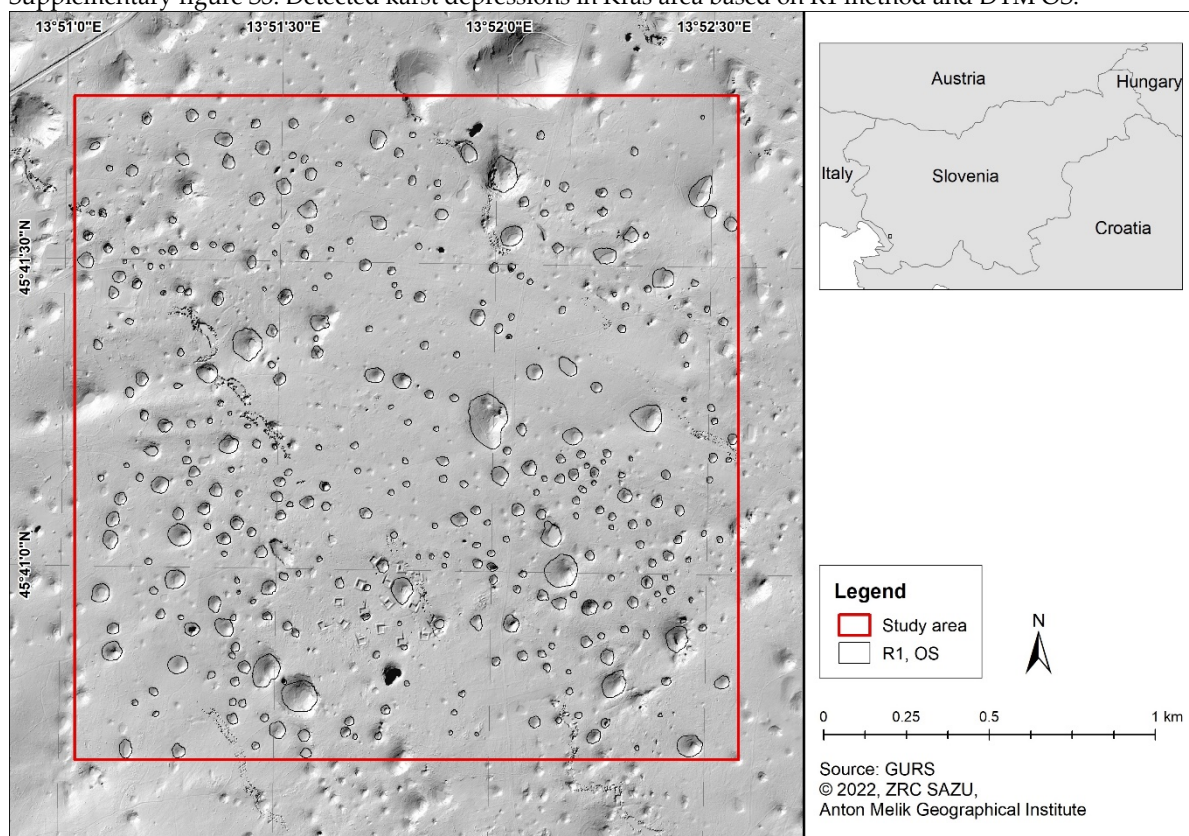

Supplementary figure S4: Detected karst depressions in Kras area based on S1 method and DTM F1.

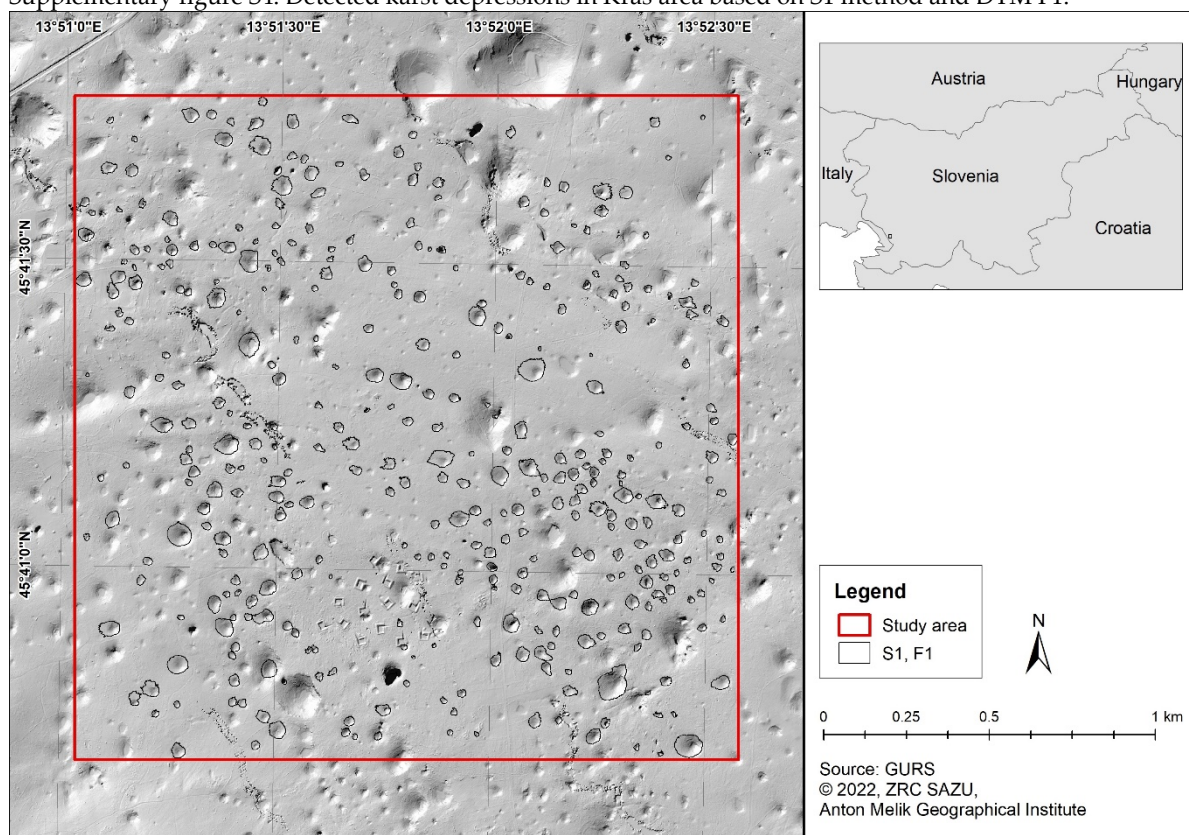



Supplementary figure S5: Detected karst depressions in Kras area based on S1 method and DTM FS5.

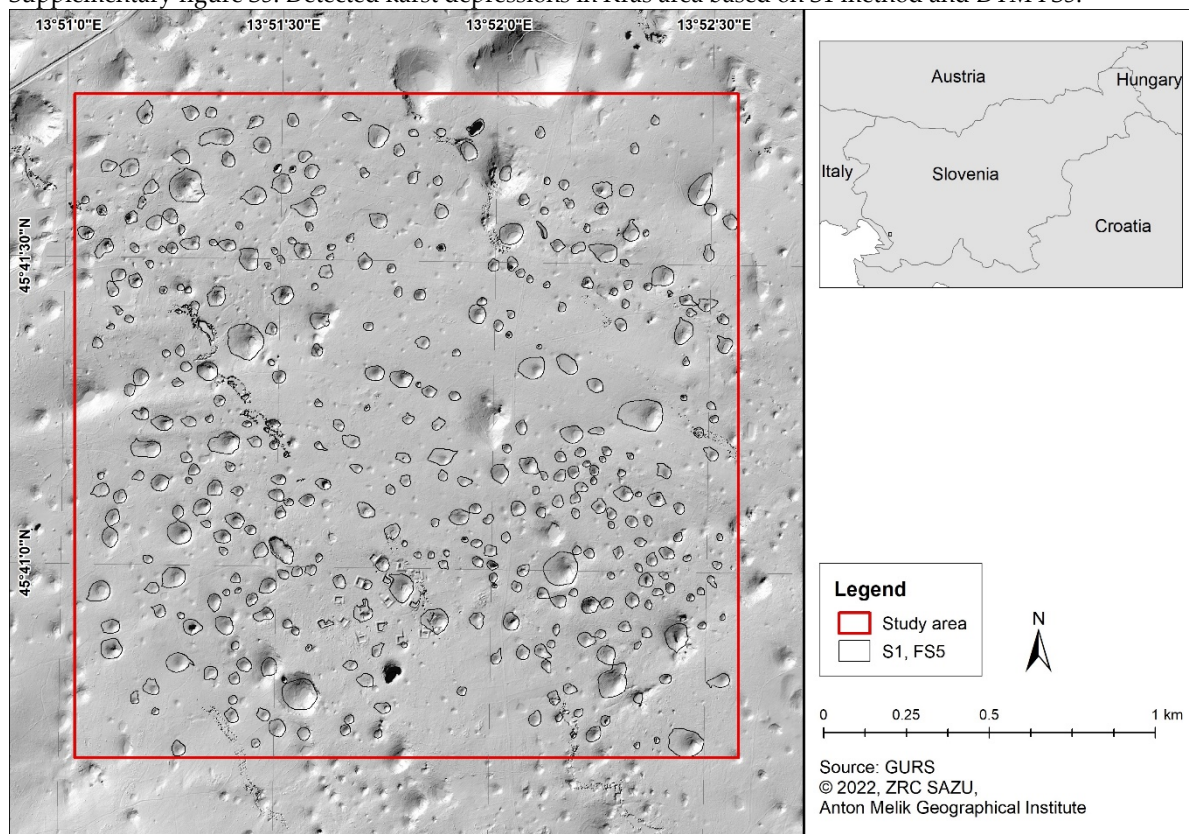

Supplementary figure S6: Detected karst depressions in Kras area based on S1 method and DTM OS.

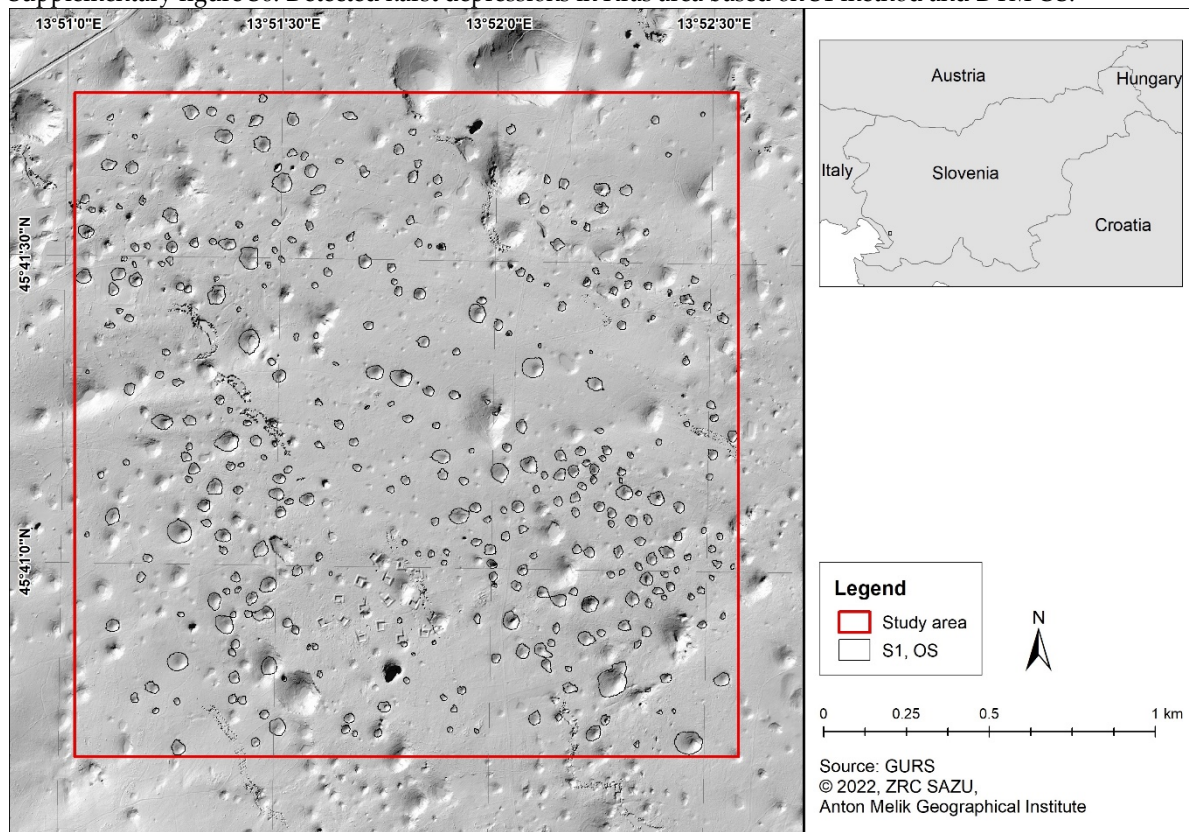



Supplementary figure S7: Detected karst depressions in Matarsko podolje area based on R1 method and DTM F1.

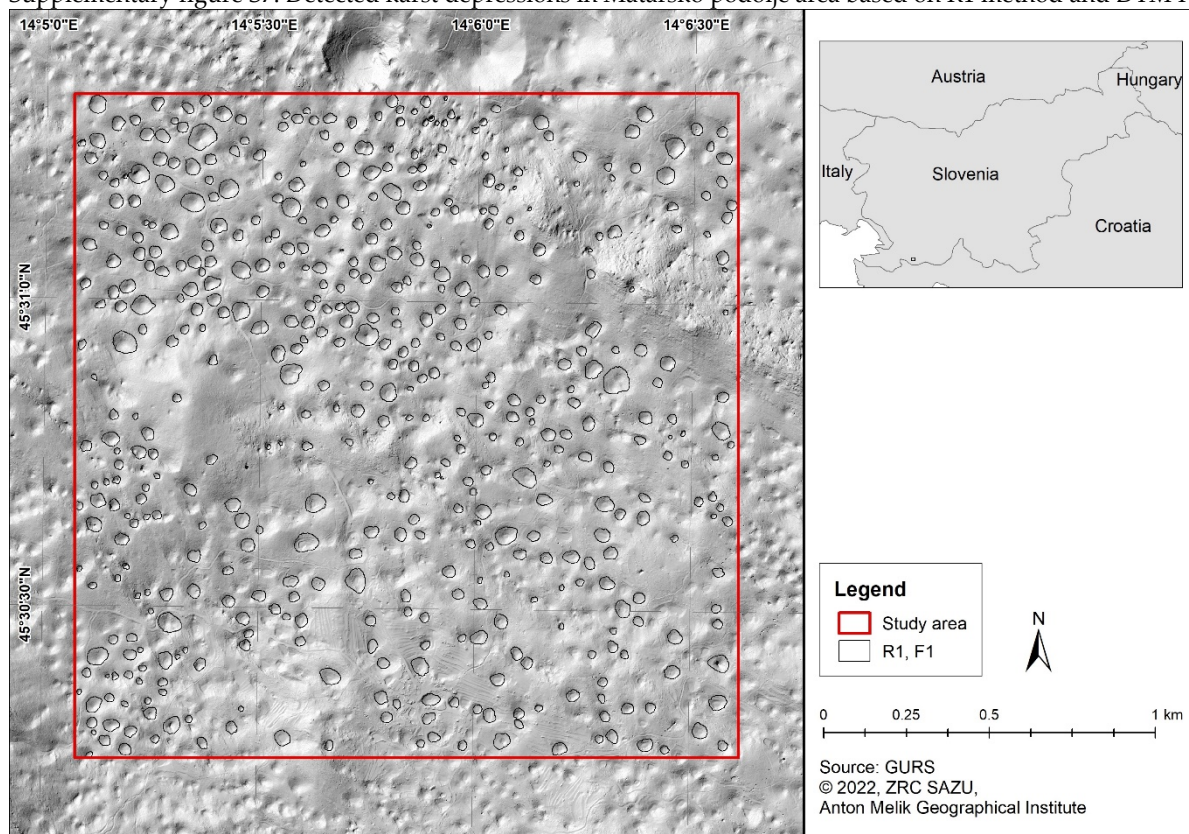

Supplementary figure S8: Detected karst depressions in Matarsko podolje area based on R1 method and DTM FS5.

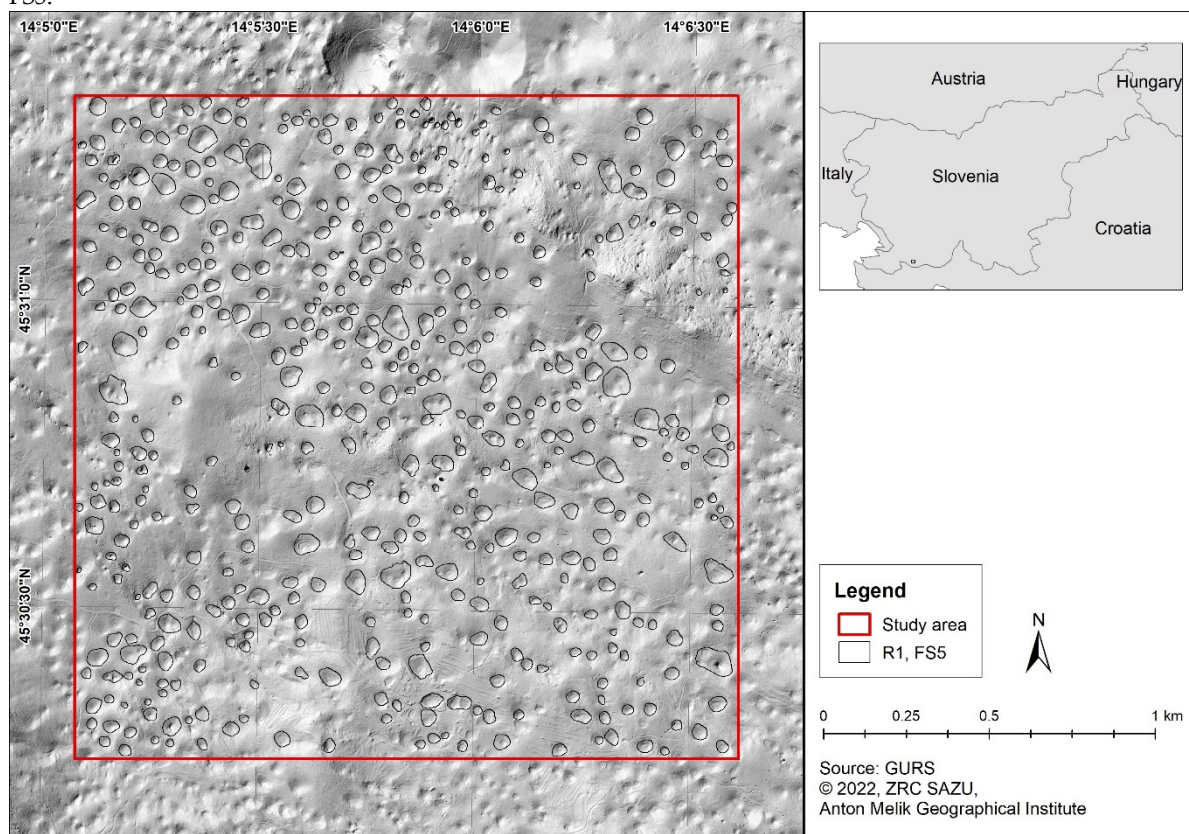



Supplementary figure S9: Detected karst depressions in Matarsko podolje area based on R1 method and DTM OS.

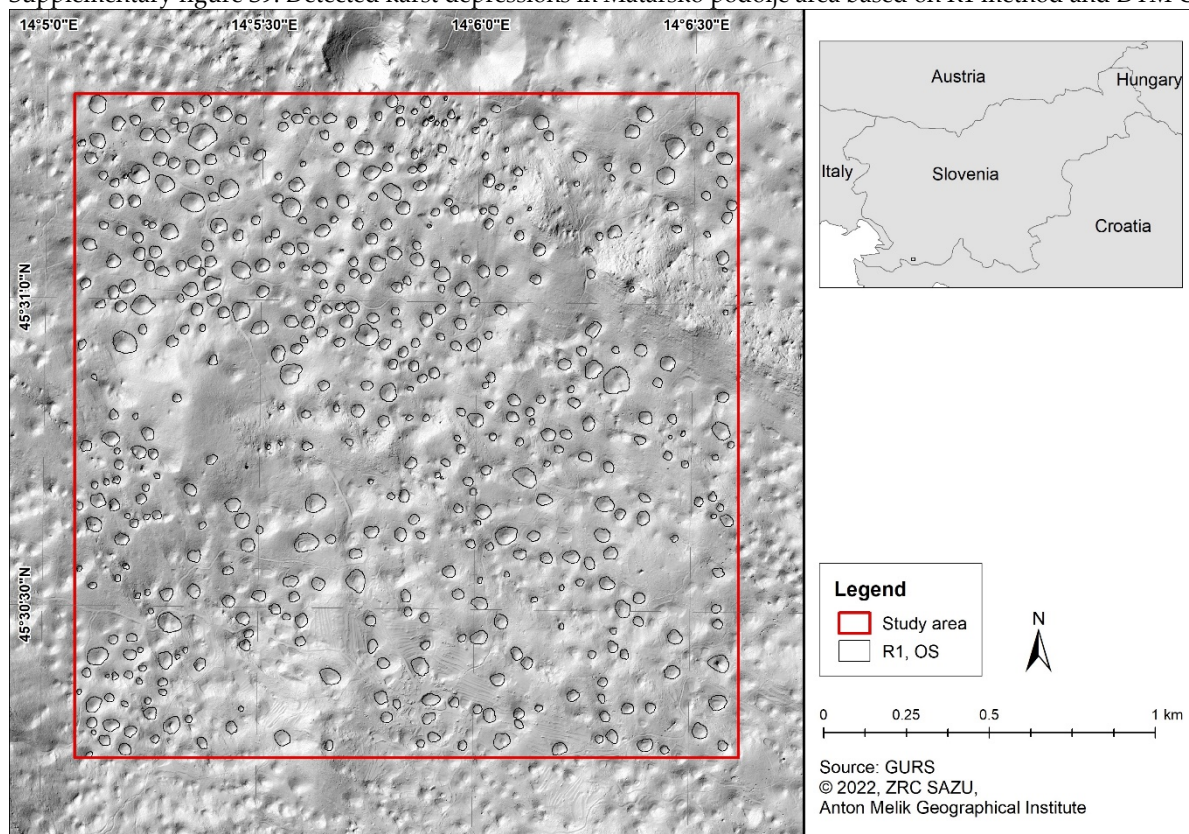

Supplementary figure S10: Detected karst depressions in Matarsko podolje area based on S1 method and DTM F1.

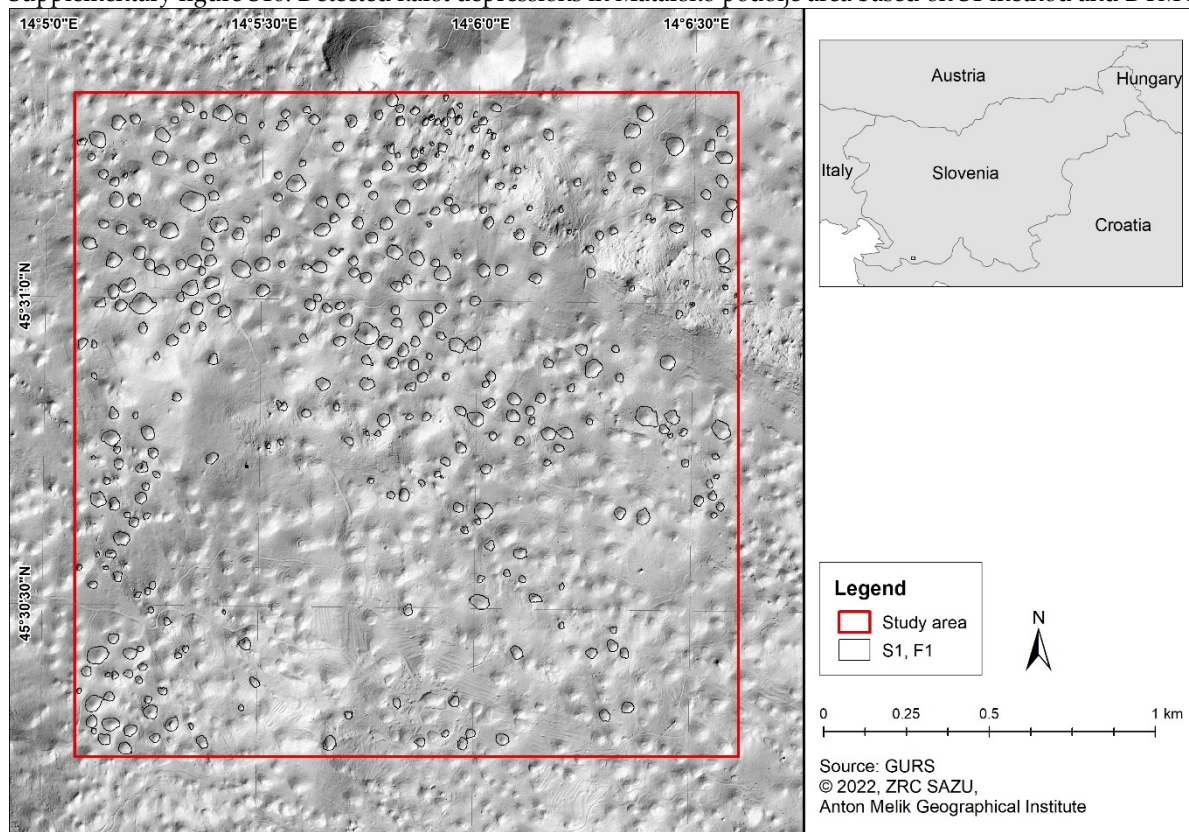



Supplementary figure S11: Detected karst depressions in Matarsko podolje area based on S1 method and DTM FS5.

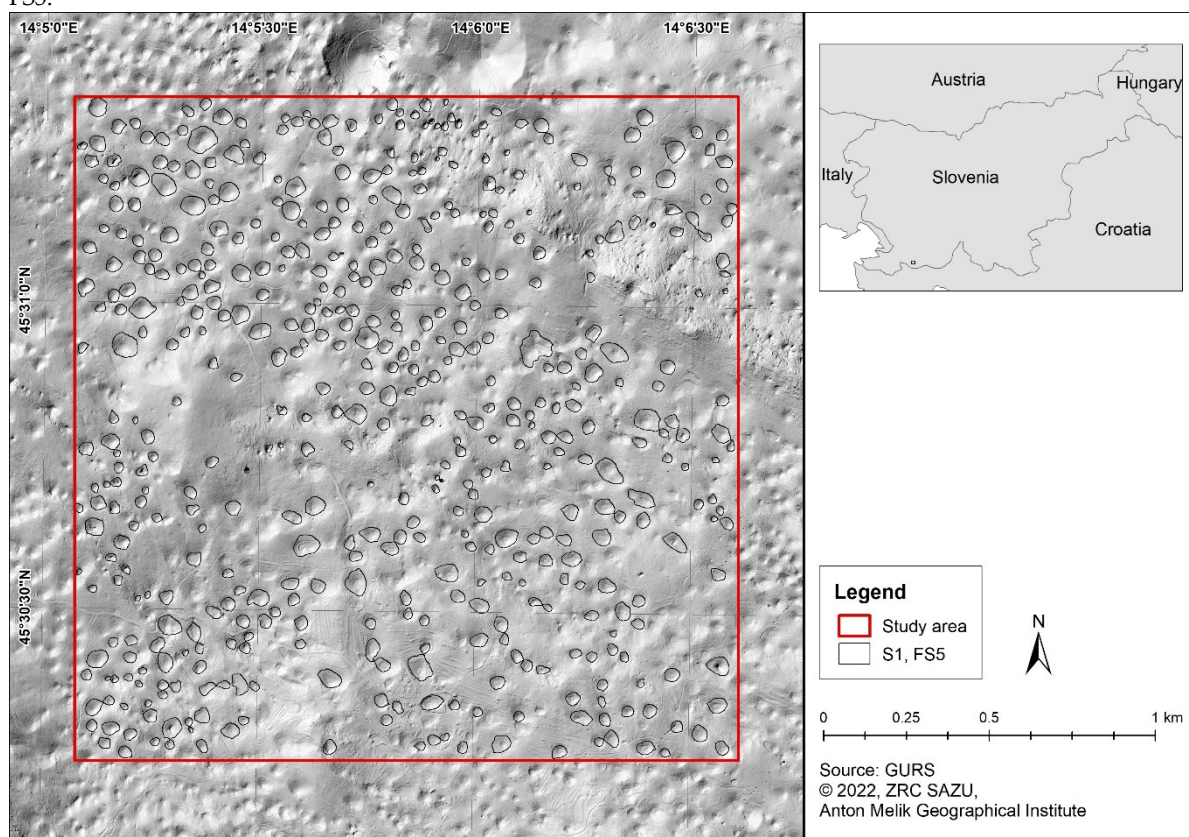

Supplementary figure S12: Detected karst depressions in Matarsko podolje area based on S1 method and DTM OS.

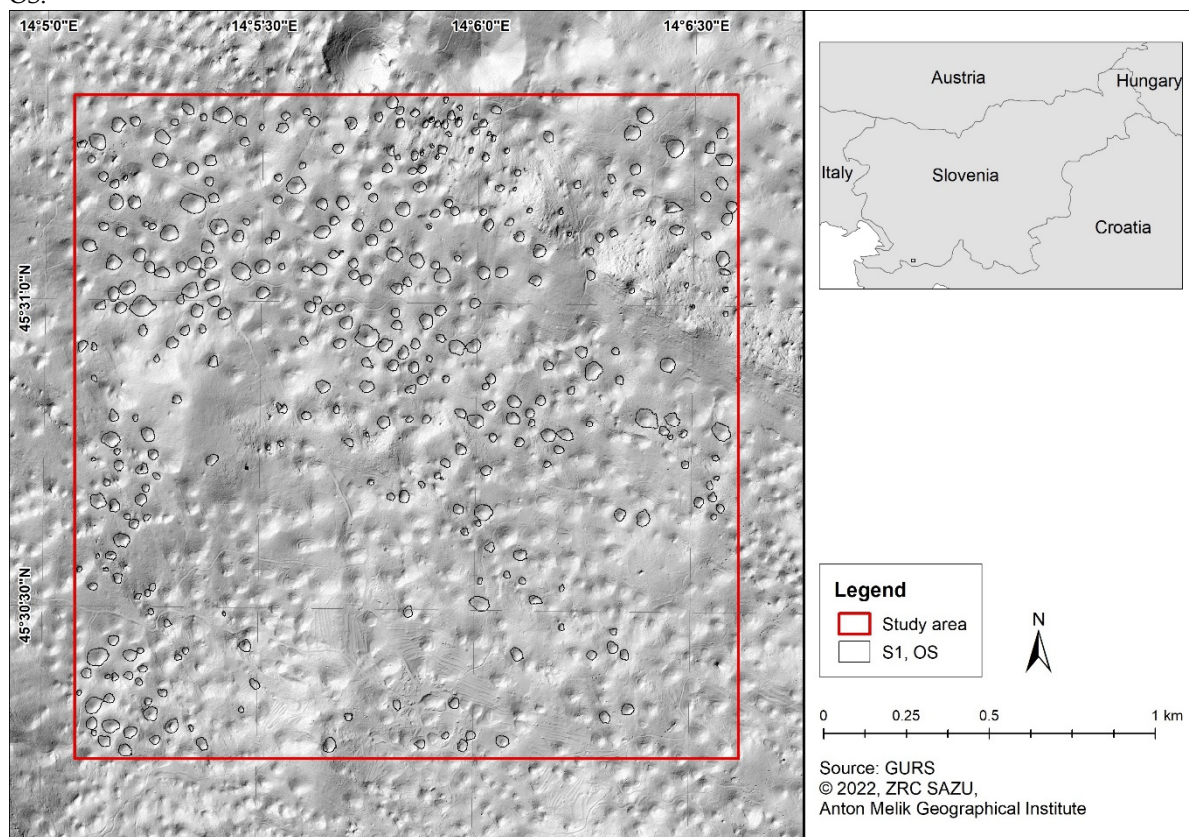



Supplementary figure S13: Detected karst depressions in Logaško-begunjski ravnik area based on R1 method and DTM F1.

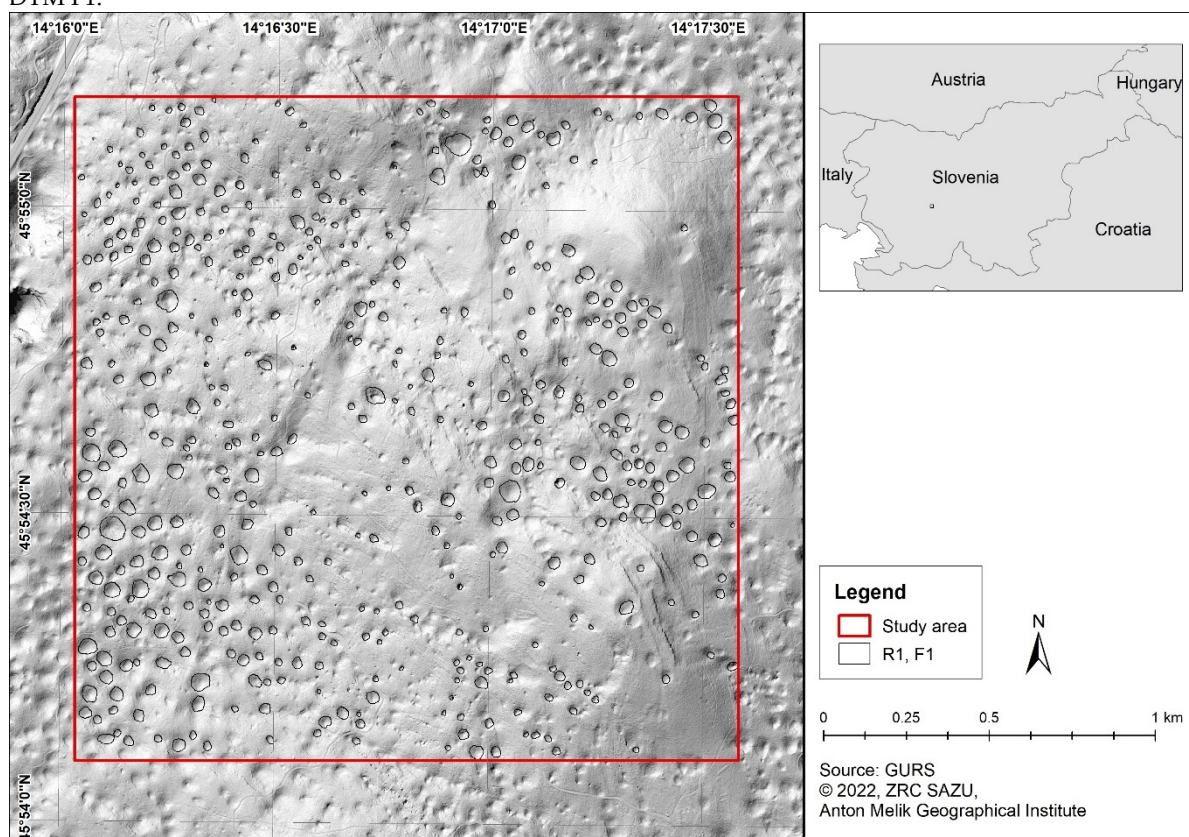

Supplementary figure S14: Detected karst depressions in Logaško-begunjski ravnik area based on R1 method and DTM FS5.

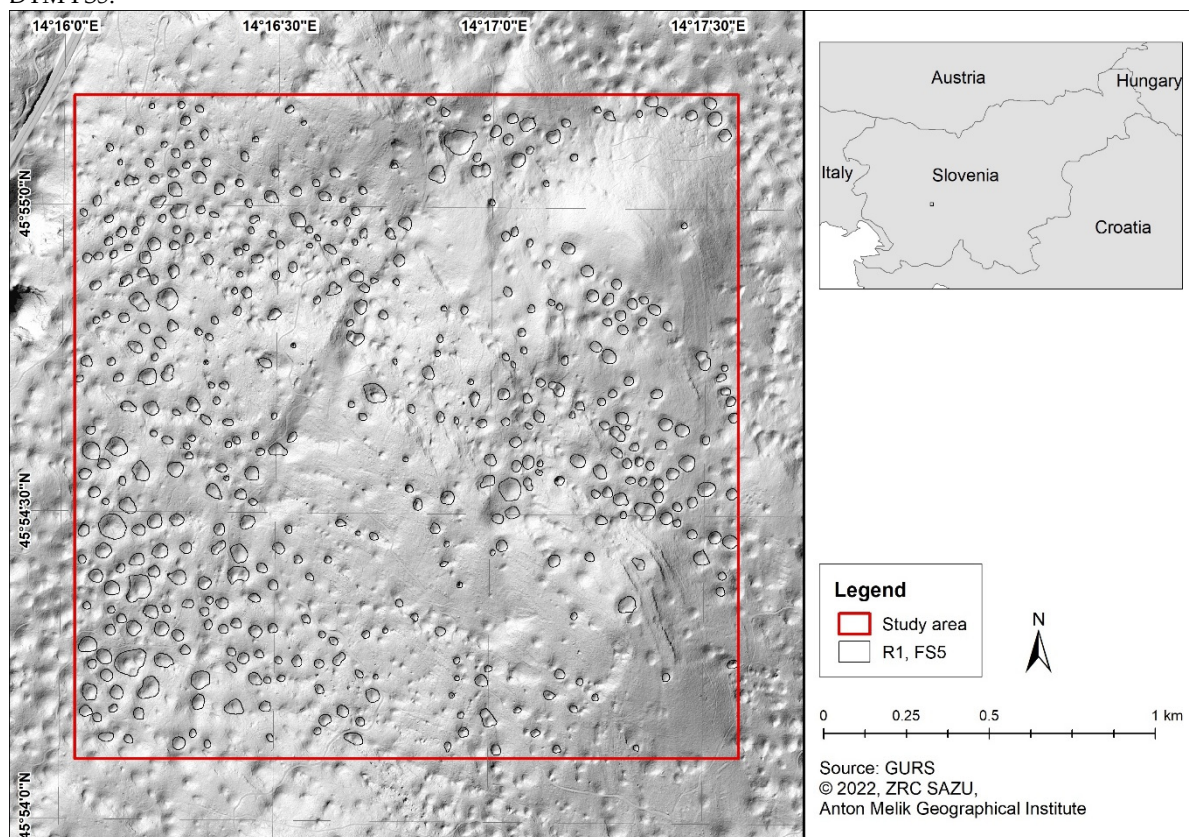



Supplementary figure S15: Detected karst depressions in Logaško-begunjski ravnik area based on R1 method and DTM OS.

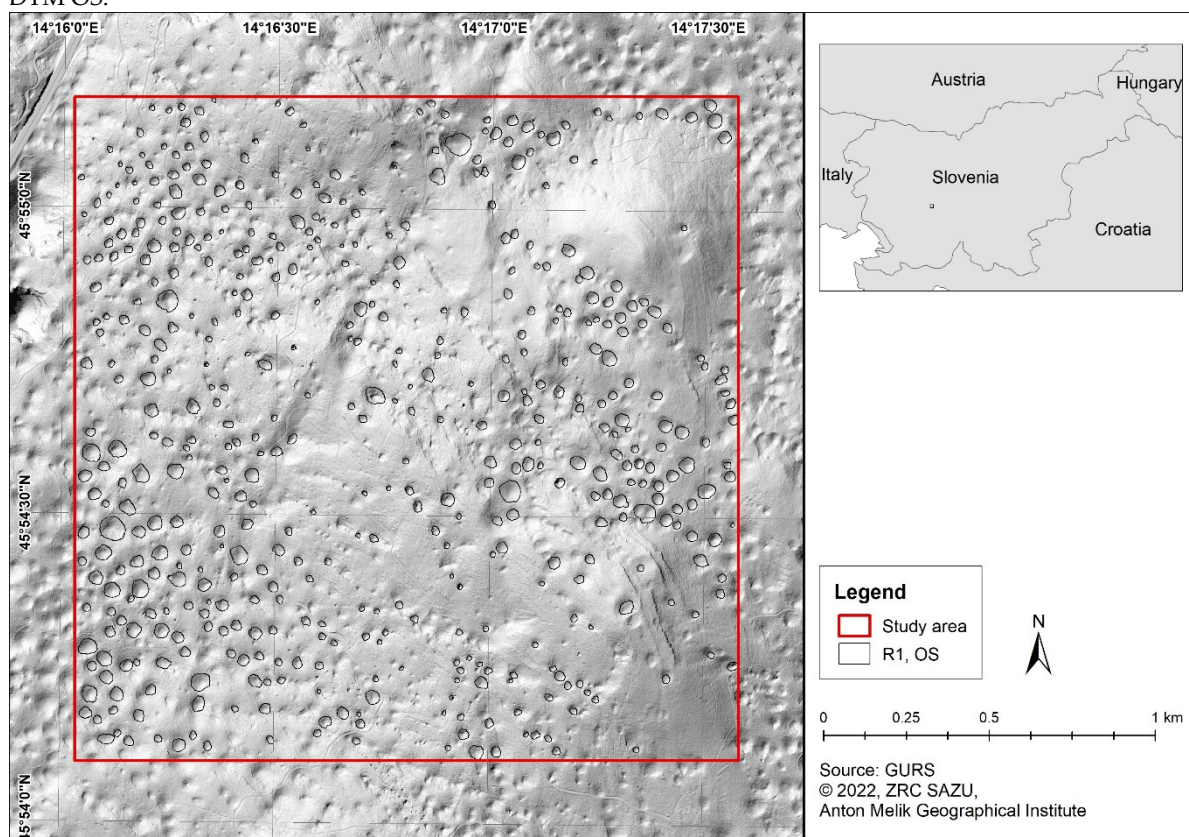

Supplementary figure S16: Detected karst depressions in Logaško-begunjski ravnik area based on S1 method and DTM F1.

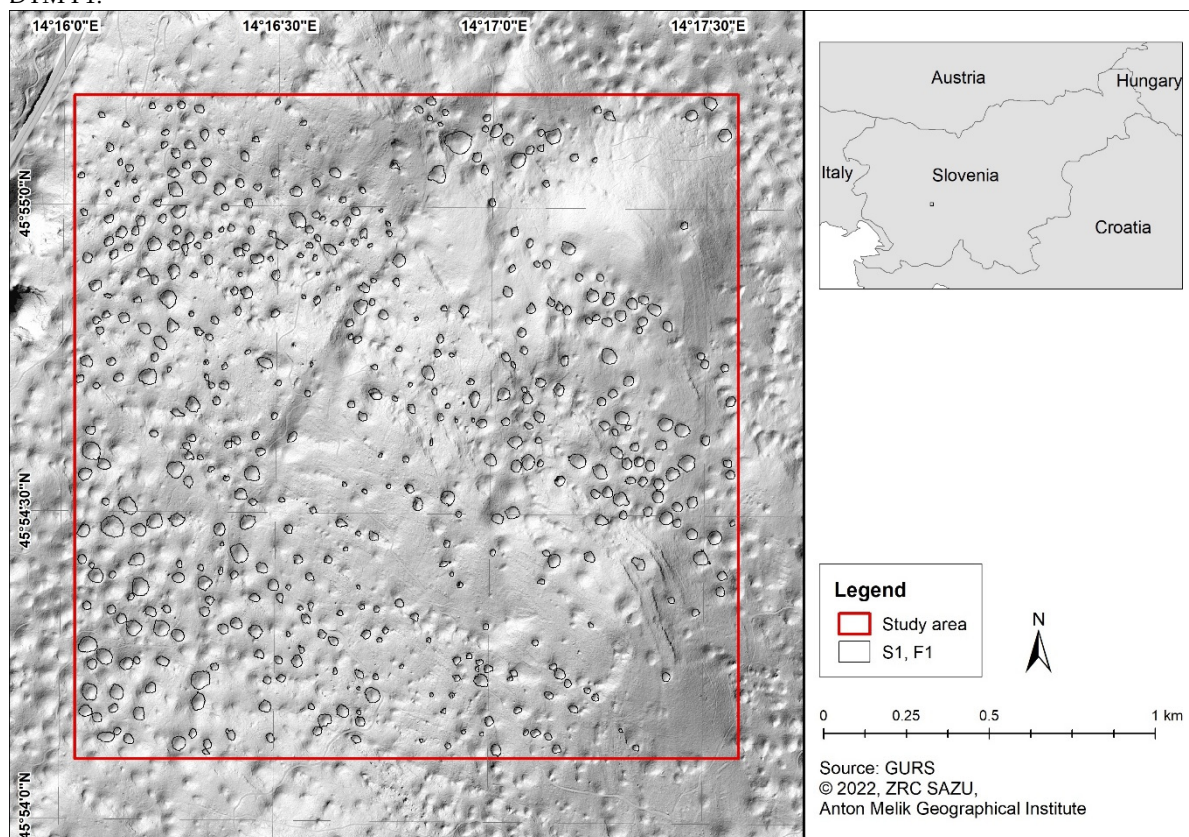



Supplementary figure S17: Detected karst depressions in Logaško-begunjski ravnik area based on S1 method and DTM FS5.

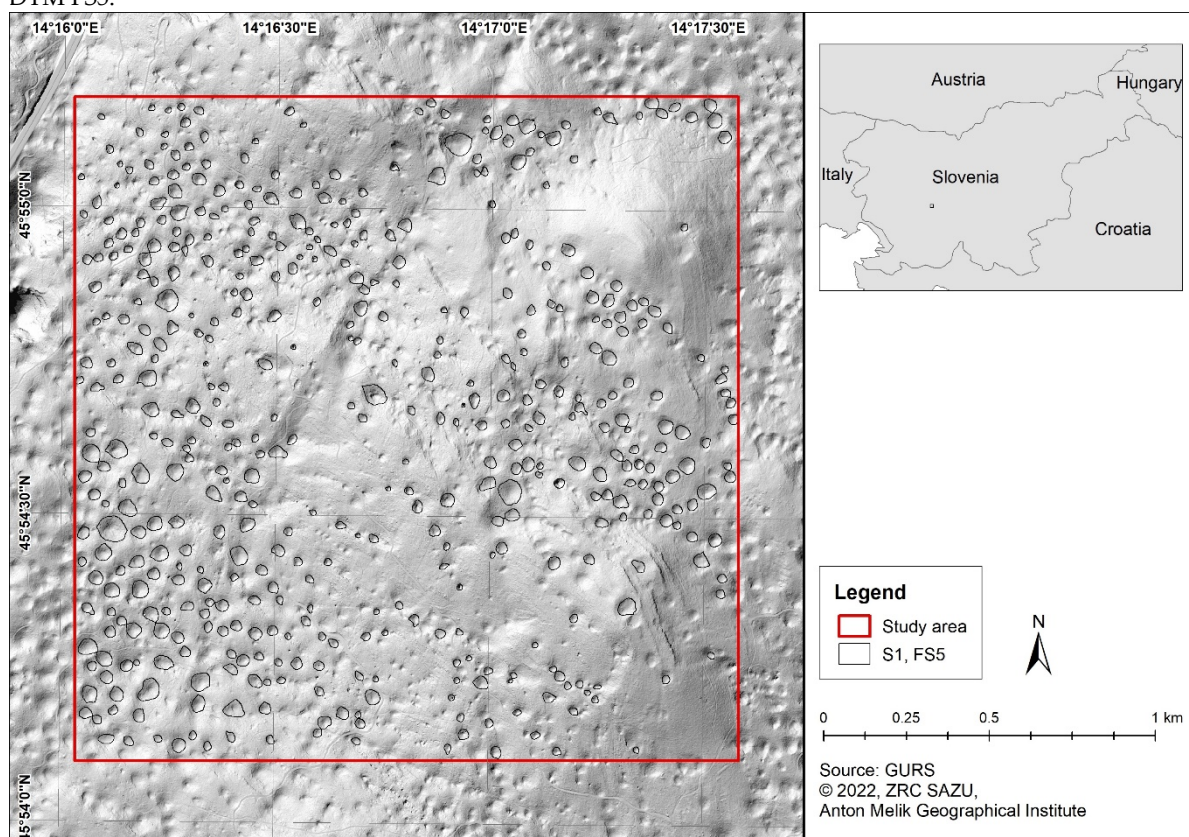

Supplementary figure S18: Detected karst depressions in Logaško-begunjski ravnik area based on S1 method and DTM OS.

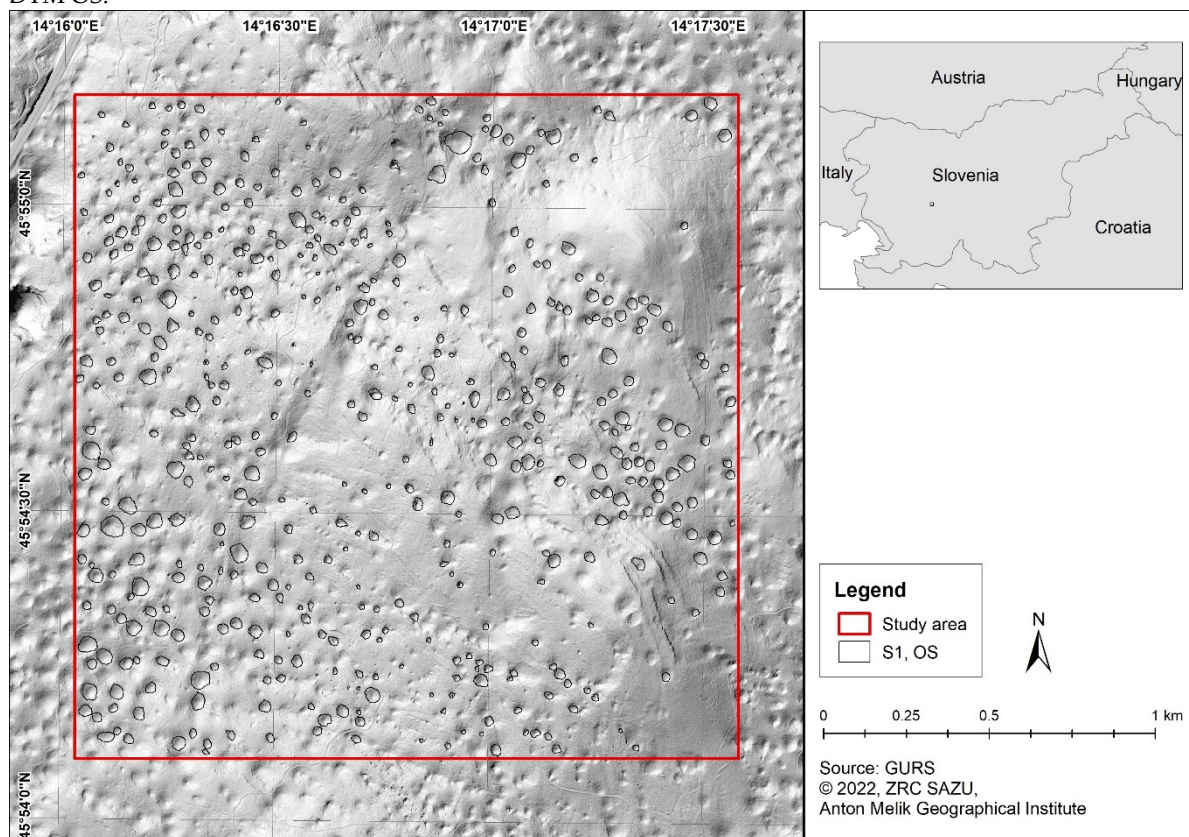

Supplement: s1 [file s1]
